1 **Linking indices for biodiversity monitoring to extinction risk**

2 **theory**

3 Michael A. McCarthy<sup>1</sup>, Alana L. Moore<sup>1</sup>, Jochen Krauss<sup>2</sup>, John W. Morgan<sup>3</sup>,

4 Christopher F. Clements<sup>4</sup>

5 <sup>1</sup>*School of Botany, The University of Melbourne, Parkville, Victoria 3010, Australia*

6 <sup>2</sup>*Department of Animal Ecology and Tropical Biology, University of Würzburg,*

7 *Biozentrum, Am Hubland, 97074 Würzburg, Germany*

8 <sup>3</sup>*Department of Botany, La Trobe University, Bundoora, Victoria 3086, Australia*

9 <sup>4</sup>*Department of Animal and Plant Sciences, University of Sheffield, Sheffield, S10*

10 *2TN, UK*

11

12 **Abstract**

13 Biodiversity indices often combine data from different species when used in  
14 monitoring programs. Heuristic properties can suggest preferred indices, but we lack  
15 objective ways to discriminate between indices with similar heuristics. Biodiversity  
16 indices can be evaluated by determining how well they reflect management objectives  
17 that a monitoring program aims to support. For example, the Convention on  
18 Biological Diversity (CBD) requires reporting about extinction rates, so simple  
19 indices that reflect extinction risk would be valuable. Here we develop three  
20 biodiversity indices based on simple models of population viability that relate  
21 extinction risk to abundance. The first index is based on the geometric mean  
22 abundance of species. A second uses a more general power mean. A third integrates  
23 both the geometric mean abundance and trend. These indices require the same data as  
24 previous indices, but they also relate directly to extinction risk. Field data for  
25 butterflies and woodland plants, and experimental studies of protozoan communities  
26 show that the indices correlate with local extinction rates. Applying the index based  
27 on the geometric mean to global data on changes in avian abundance suggests that the  
28 average extinction probability of birds has increased approximately 1% from 1970 to  
29 2009.

30

31 **Keywords:** biodiversity index, biodiversity measure, extinction risk, geometric mean.

32

### 33 **INTRODUCTION**

34 The importance of biodiversity for a healthy and equitable society has been  
35 acknowledged by over 190 countries who ratified the Convention on Biological  
36 Diversity (CBD). The convention has a specific target to reduce the extinction risk of  
37 species (Secretariat of the CBD 2010), so monitoring of species extinction is  
38 important. Reporting actual extinctions, while potentially informative, is  
39 retrospective, whereas the convention and many other biodiversity programs seek to  
40 reduce future extinctions. Further, retrospective assessments are subject to error  
41 because the fate of species is known imprecisely (Collar 1998; Keith & Burgman  
42 2004; Rout et al. 2010). Hence, biodiversity monitoring programs would be more  
43 valuable if they can be interpreted in terms of extinction risk.

44 Changes in the assessed risk to species can contribute to biodiversity monitoring. For  
45 example, the IUCN Red List is used to calculate the Red List Index (RLI, Butchart et  
46 al. 2007), one of four global indicators of biodiversity status and trends approved by  
47 the CBD (Jones et al. 2011). The relationships of the other three indicators (extent of  
48 forest; protected-area coverage; and the Living Planet Index, LPI, Jones et al. 2011) to  
49 extinction risk are not explicit.

50 Buckland et al. (2005) identified three aspects of species diversity that are of primary  
51 interest when monitoring changes over time: number of species, overall abundance  
52 and species evenness, from which they derived six desirable criteria for an index of  
53 biodiversity based on abundance data. On evaluating several proposed indices against  
54 these criteria, the geometric mean of relative abundances was one of only two that  
55 met all six criteria. van Strien et al. (2012) lend further support to the geometric mean.

56 While we agree with the heuristic properties used to assess different indices of  
57 biodiversity, a good index should also be clearly related to particular management  
58 objectives or biodiversity outcomes. For example, where extinction risk is the  
59 management concern, understanding how the index reflects changes in this risk would  
60 be desirable. In the absence of a single measurable definition of biodiversity  
61 (Secretariat of the Convention on Biological Diversity 2010; Jones et al. 2011), we  
62 aim to examine how abundance data might be used to monitor extinction rates of  
63 species for the purposes of reporting under the CBD and other biodiversity programs.

64 Here, we use simple models of population viability to develop three indices of  
65 extinction risk based on abundance data. These indices are designed to have the same  
66 data requirements as those considered by Buckland et al. (2005), but with the  
67 additional benefit of being directly related to extinction risk. We evaluate the indices  
68 using simulation, field data on local extinctions of butterflies and woodland plants,  
69 and experimental data on protozoan communities. Finally, we interpret changes in the  
70 LPI in terms of changes in the average probability of extinction of species.

## 71 **Methods**

72 The indices are derived from simple models of population viability, using clearly  
73 articulated assumptions that can be tested. First, consider the case when the long-term  
74 average population growth of each species is negative. If we assume that each species  
75 is experiencing deterministic exponential decline, then

$$76 \quad x(t) = x(0)\lambda^t,$$

77 where  $x(t)$  is population abundance at time  $t$ , and  $\lambda$  is the growth parameter ( $\lambda < 1$  for  
78 a declining population). It is then straightforward to calculate that extinction (such

79 that  $x(t) = 1$  occurs at time  $T = -\ln[x(0)]/\ln[\lambda]$ . If the long-run growth rate is  
80 negative, then for stochastic population models the mean extinction time is also  
81 approximately logarithmically dependent on initial population size (Lande 1993).

82 With the simplifying assumption that the rate of decline is the same for each species  
83 (we address this particular assumption later), the mean expected time to extinction,  
84 averaging over  $n$  species, is proportional to the mean of the logarithm of population  
85 abundance. As we show below, the mean expected time to extinction is proportional  
86 to the logarithm of the geometric mean of population abundances ( $M_0$ );

$$\begin{aligned} 87 \quad \bar{T} &\propto \overline{\ln(x)} = \frac{1}{n} \sum_{i=1}^n \ln(x_i) \\ 88 \quad &= \ln \left( \left[ \prod_{i=1}^n x_i \right]^{1/n} \right) \\ 89 \quad &= \ln(M_0). \end{aligned} \tag{1}$$

90 Equation 1 relates the mean time to extinction to the geometric mean abundance.  
91 However, it would be helpful to determine how this index might relate to the  
92 proportion of species going extinct. We approximate this by assuming that times to  
93 extinction have an exponential distribution. The proportion of species going extinct  
94 within time  $t$  is then  $1 - \exp(-t/\bar{T})$ . When this proportion is  $\leq 0.2$ , it can be  
95 approximated by  $t/\bar{T}$ , leading to:

$$96 \quad I_g = \frac{1}{\ln(M_0)}. \tag{2}$$

97 This index should correlate linearly with the proportion of species going extinct under  
98 the assumptions stated above.

99 We develop a second index based on a different set of assumptions. We consider a  
100 stochastic population model in which the logarithm of the population growth rate has  
101 a normal distribution with a mean of zero and variance  $\sigma^2$ . For this model, the risk of  
102 extinction within a given time period  $t$  is (Ginzburg et al. 1982; Dennis et al. 1991;  
103 McCarthy & Thompson 2001):

$$104 \quad q_i(x_0) = 2\phi(-v) .$$

105 where  $\phi()$  is the standard normal cumulative distribution function,  $v = -\ln(1/x_0)/(\sigma\sqrt{t})$   
106 and  $x_0$  is the initial population size. This functional form could be used as an index,  
107 but it does not provide a simple numerical solution. Instead, we approximated this  
108 equation by a function of the form,  $A x^{-B/(\sigma\sqrt{t})}$ , with the values of  $A$  and  $B$  depending on  
109 the value of the extinction risk. For small extinction risks,  $q_i < \approx 0.15$ ,  $A = 2.2$  and  $B =$   
110  $1.87$  provide a good approximation. When the extinction risk is close to one, a better  
111 approximation is  $A = 1$  and  $B = 0.798$ . Regardless, the probability of extinction scales  
112 approximately with abundance in proportion to  $x^{-b}$ , with  $b = B/(\sigma\sqrt{t})$ . Thus, averaged  
113 across  $n$  species, we would expect the proportion of species going extinct to be

$$114 \quad L = \sum_{i=1}^n q_i / n = k \sum_{i=1}^n x_i^{-b} / n = k(M_{-b})^{-b}, \quad (3)$$

115 where  $k$  is a constant of proportionality and  $M_{-b}$  is a power mean of abundance with  
116 power  $p = -b$ ,

$$117 \quad M_{-b} = \left( \frac{1}{n} \sum_{i=1}^n x_i^{-b} \right)^{-1/b} .$$

118 Consequently, our second index is based on a power mean of abundance:

$$119 \quad I_b = (M_{-b})^{-b}. \quad (4)$$

120 The value of  $b$  depends on the time horizon over which risks are assessed. If we  
121 consider a time horizon of  $T=100$  years and a standard deviation of  $\sigma=0.1$  (Dennis et  
122 al. 1991), the extinction risk of each species is likely to be relatively small (recall,  
123 zero mean growth rate), and  $b$  would be of the order  $1.8 \approx 2$ . The value of  $b$  will be  
124 larger for shorter time horizons.

125 A third index can be derived from the deterministic model that accounts for the  
126 population growth rate, in addition to population size. Noting again that the mean  
127 time to extinction under deterministic decline is  $-\ln[x(0)]/\ln[\lambda]$ , then the proportion of  
128 species going extinct can be approximated by  $-\ln[\lambda]/\ln(M_0)$ , allowing communities  
129 with different population growth rates of species to be compared. Using the mean of  
130 the logarithmic population growth rate of species within a community,  $\mu_r$ , as the  
131 estimate of  $\ln[\lambda]$  leads to the index:

$$132 \quad I_t = \frac{-\mu_r}{\ln(M_0)}. \quad (5)$$

133 This index requires extra data, being the population growth rates of species within the  
134 community. Such data might be uncommonly available, but are necessary to compare  
135 risks among communities where the species are declining at different rates.

### 136 **Simulations for evaluating indices**

137 Stochastic simulations of species within communities were used to evaluate how well  
138 the different indices correlated with the proportion of species going extinct. Each

139 community consisted of 500 species, and there were 100 different communities. For  
140 each species  $j$  in community  $i$ , we simulated the population dynamics over 20 time  
141 steps using the exponential growth model such that the population size in time  $t+1$  is  
142 given by:

$$143 \quad x_{ijt+1} = \lambda_{ijt} x_{ijt}.$$

144 Parameter values for the 100 different communities were chosen such that the  
145 proportion of species going extinct spanned a wide range (in our case between 0.02  
146 and 0.64). Within each community, the initial population size  $\ln x_{ij0}$  was drawn from a  
147 lognormal distribution with mean  $\mu_N$  and coefficient of variation  $c_N$ , and the  
148 logarithmic growth rate  $\ln \lambda_{ijt}$  was drawn from a normal distribution with mean  $\mu_r$  and  
149 standard deviation  $\sigma_r$ . The proportion of 500 species that fell to or below one  
150 individual measured the average extinction risk of the community.

151 To ensure that each community had different initial population sizes and different  
152 trends in abundance (and hence different average extinction risks), the mean and  
153 coefficient of variation of the population size ( $\mu_N$  and  $c_N$ ) and the mean and standard  
154 deviation of population growth rate ( $\mu_r$  and  $\sigma_r$ ) of each was varied among  
155 communities. The coefficient of variation  $c_N$  was drawn from a uniform distribution  
156 on the interval [0.5, 3.0]. The mean population size was equal to  $1.2^d 100$ , where  $d$  was  
157 drawn from a uniform distribution on the interval [0, 20], so mean population size  
158 varied among communities over the interval [100, 3834]. The mean population  
159 growth rate ( $\mu_r$ ) was drawn from a uniform distribution on the interval [-0.3, -0.1],  
160 and the standard deviation ( $\sigma_r$ ) was drawn from a uniform distribution on the interval  
161 [0.05, 0.4]. To test how differences in abundance, rather than population trend,



162 influence the performance of the indices, data were also simulated with  $\mu_r$  set to  $-0.2$   
163 for all communities.

164 The three indices of extinction risk ( $I_g$ ,  $I_b$  and  $I_t$ ) were calculated for the simulated  
165 communities and the correlations between these and the proportion of species going  
166 extinct was examined. The performance of the arithmetic mean abundance and the  
167 modified Shannon diversity index of Buckland et al. (2005), other putative  
168 biodiversity measures, were also examined for the simulated data. For these two  
169 cases, we multiplied the indices by  $-1$  so that the indices would be expected to be  
170 positively correlated with extinction risk.

#### 171 **Data for evaluating indices**

172 The correlation between the indices and local extinction risk was evaluated using field  
173 data on Lepidoptera (Krauss et al. 2003) and woodland plants (Sutton and Morgan  
174 2009). Because data on differences in population trend among sites and species were  
175 unavailable, only eqns 2 and 4 were evaluated. We evaluated all three indices with  
176 data from experimental protozoa communities (Clements et al. 2013). The original  
177 publications detail the data and its collection; some information is provided here for  
178 context.

179 The abundances of butterfly species in 31 patches of habitat were estimated in both  
180 1996 and 2000 (Krauss et al. 2003). Data were restricted to those species present in at  
181 least 24 of the 31 patches so that extinction risk was assessed for a pool of species that  
182 were relatively similar at all sites. Thus, differences among sites tended to reflect  
183 differences in abundance rather than inherent differences among species. For all these  
184 species, probabilities of detection given presence, based on occupancy/detection

185 models (Stauffer et al. 2002) using data on detections in sets of 5-minute intervals,  
186 were estimated to be >95% in the surveys. In each patch, between 13 and 16 of the  
187 species being considered were observed in the first instance. For each index, we  
188 plotted the mean extinction risk (calculated as the proportion of species that went  
189 extinct) against the index. For this case study, the time horizon is relatively short,  $T =$   
190 8 (assuming two generations per year). For the second index, this results in  $b \approx 6.6$   
191 assuming  $\sigma = 0.1$ . Greater variability in the population dynamics (i.e.,  $\sigma > 0.1$ ) would  
192 lead to smaller values for  $b$ . The data were also analysed when the data were restricted  
193 to species that were genuine grassland specialists, but as the results were qualitatively  
194 the same, only results with the larger number of species are reported.

195 The composition and abundance of all native plant species of ten grassy woodland  
196 patches in western Victoria, Australia were surveyed in 2006 (Sutton and Morgan  
197 2009). These data were compared to the species composition and population  
198 abundance of the same patches observed in 1975 to determine patch extinction rates.  
199 To reduce false absences, sites were surveyed on three occasions, with the time spent  
200 searching being proportional to each site's size and heterogeneity. To further  
201 minimize chances of missed detections, we restricted our analyses to perennial  
202 species. Finally, we limit variation in extinction risk due to idiosyncratic differences  
203 among species by considering only species that were present in at least eight of the  
204 ten patches in the analysis.

205 Abundances of the plants was estimated in 1975 using a four-point scale: "Very Rare"  
206 (less than two dozen individuals seen across the site), "Rare" (appearing in dozens),  
207 "Common" (appearing in hundreds), "Very Common" (appearing in thousands). The  
208 discretised and censored data meant we were unable to calculate the indices directly.

209 Instead, we fitted a Pareto distribution to the abundance data, using maximum  
210 likelihood methods, and calculated the indices from the parameters of the estimated  
211 distribution. To fit the Pareto distribution, we assumed that the four abundance class  
212 were distinguished by threshold values of 24, 100 and 1000 (*i.e.*, “Very Rare” was  
213 assumed to be <24 individuals, “Rare” was 24-100, etc).

214 We chose to fit a Pareto distribution since, for the deterministic model with negative  
215 growth rate, if the mean time to extinction ( $T$ ) is exponentially distributed with  
216 parameter  $\theta$ , abundance ( $x = \exp[T/k]$ ) is a Pareto random variable with scale  
217 parameter  $x_m = 1$ , and shape parameter  $\alpha = k\theta$  (Krishnamoorthy 2006). We also fitted a  
218 log-normal distribution instead of a Pareto distribution. The results obtained were  
219 very similar in both cases, so we only present results for the Pareto. Assuming  $\sigma=0.1$   
220 and  $T=30$  leads to  $b = 3.4$  in the power mean index  $I_b$ .

221 Experimental protozoan communities were assembled with 4 ciliate species, at 2  
222 temperatures (15 °C and 20 °C), and sampled for abundance data 3 times a week for  
223 163 days (Clements et al. 2013). Four 3-species communities and one 4-species  
224 community were replicated at each temperature giving a total of 10 communities (a  
225 “community” in this case being a particular combination of species and temperatures).  
226 Extinction events were driven by either competitive exclusion or starvation.

227 Population trends between days 5 and 9, abundance at day 9, and the proportion of  
228 species extinct by day 163, were calculated and averaged across replicates. Day 9 was  
229 chosen as the initial date because this day occurred prior to all but one extinction  
230 event, and effects of initial conditions on the community dynamics had attenuated.

231 Each community was replicated 5 times each, except for one community in which a  
232 replicate was excluded when a species went extinct prior to day 9. The indices for

233 each of the 10 communities were then compared to the proportion of species extinct  
234 by day 163. Given the ecological time frame of this experiment ( $\approx 200$  protozoan  
235 generations; Clements et al. 2013), the extinctions observed indicate possible long-  
236 term extinction trends. The parameter  $b$  in the index based on the power mean was  
237 approximately 1.3, assuming  $\sigma = 0.1$ .

### 238 **Relating $I_g$ to the Living Planet Index**

239 The LPI is the geometric mean abundance of vertebrate species in a particular year  
240 divided by the geometric mean in 1970 (Loh et al. 2005, Collen et al. 2009).  
241 Therefore, the index based on the geometric mean can be related to the LPI simply as  
242  $I_g = 1/\ln(c \text{ LPI})$ , where  $c$  is the geometric mean abundance in 1970. If  $I_g$  is  
243 proportional to the probability of extinction, as assumed in its derivation, LPI values  
244 can be converted to proportional changes in the probability of extinction of species,  
245 which will equal  $-\ln(\text{LPI}) / [\ln(c) + \ln(\text{LPI})]$ . We calculated this quantity for the  
246 world's birds based on published avian LPI values (Baille et al. 2010).

247 These proportional changes depend on  $c$ , which is not well known. The arithmetic  
248 mean abundance of birds is thought to be approximately 10 million individuals per  
249 species but, because species abundance distributions are heavily right-skewed, the  
250 geometric mean will be substantially less (Gaston and Blackburn 2003). We estimated  
251 the global species abundance distribution of birds, and hence the geometric mean, by  
252 fitting a log-normal distribution to data on reported population size for the global list  
253 of 1253 threatened species on BirdLife International's website  
254 (<http://www.birdlife.org/datazone/species/search>; accessed 20 December 2011) and  
255 assuming an arithmetic mean of 10 million birds per species. We assumed that  
256 abundances of the remaining 8663 non-threatened species were greater than 1000. In

257 this case, and in cases where the data on threatened species were provided as ranges,  
258 we fitted the model assuming censored data. When an upper limit was not provided,  
259 we set the upper limit of 10 billion individuals for each species, which is greater than  
260 the reported abundance of passenger pigeons, the world's most abundant bird prior to  
261 its extinction. The geometric mean of the resulting log-normal probability distribution  
262 was then calculated. The sensitivity of the results to the calculated value of  $c$  was  
263 examine by varying  $c$  by one order of magnitude and re-calculating the proportional  
264 changes in the probability of extinction.

## 265 **Results**

266 For the simulated communities with variation in mean growth rate among  
267 communities, the index based on the power mean ( $I_b$ ) and the index based on the  
268 geometric mean ( $I_g$ ) were positively correlated with the proportion of species going  
269 extinct (Pearson product moment correlations  $r = 0.39$  and  $r = 0.50$ , respectively).  
270 Spearman rank correlations were similar ( $r_s = 0.34$  and  $0.49$  respectively). Variation  
271 in mean growth rates among communities explained much of the imperfect  
272 correlations; correlations for the index that is based on population trend were high ( $r =$   
273  $0.96$ ;  $r_s = 0.99$  for  $I_t$ ), and were similarly high for the geometric mean index ( $I_g$ ) when  
274 all communities had the same mean rate of decline ( $r = 0.97$  when  $\mu_r = -0.2$  for all  
275 communities).

276 The index based on the geometric mean ( $I_g$ ) and the index that considers population  
277 trend ( $I_t$ ) were more strongly correlated with the proportion of species going extinct  
278 than either index based on the arithmetic mean or the Shannon diversity ( $r = 0.44$  in  
279 both cases when  $\mu_r$  varied on the interval  $[-0.3, -0.1]$ , and  $r = 0.94$  and  $0.91$   
280 respectively when  $\mu_r$  was  $-0.2$ ). The index based on the power mean ( $I_b$ ) was the least

281 strongly correlated with the proportion of species going extinct ( $r = 0.39$  when the  
282 mean population growth rate varied among communities,  $r = 0.66$  when it was  
283 consistent); this might be expected given the strong influence of the population trend  
284 on the simulated extinction risks, whereas the index  $I_b$  assumed no trend.

285 The index based on the geometric mean abundance was positively correlated with the  
286 proportion of Lepidoptera and woodland plant species that went extinct ( $r = 0.67$  and  
287  $0.66$  respectively; fig. 1a,b). The correlation was  $-0.32$  for the protozoan community  
288 (fig. 1c), although abundances were similar for most communities, so the index  
289 spanned a narrow range. Thus, the data had little power to indentify a relationship.  
290 The correlation was positive when differences in population trends in the protozoan  
291 community were accommodated by using the index  $I_t$  ( $r=0.33$ ; fig. 2).

292 The correlations between the proportion of species going extinct and the index based  
293 on the power mean were  $r = 0.25$  for the butterfly data,  $r = 0.40$  for the woodland  
294 plants, and  $r = -0.20$  for the protozoan community (fig. 3). Again, the narrow range of  
295 abundances for the protozoan community limited the ability of this dataset to reveal  
296 the nature of the relationship between the index and the proportion of species going  
297 extinct, especially given the large influence of population trends on extinction in these  
298 data.

299 The geometric mean abundance ( $c$ ) of birds was estimated to be approximately  
300 100,000 individuals per species. Assuming that the index based on the geometric  
301 mean is proportional to the extinction risk of species at the global scale, the reported  
302 decline in the LPI for birds from 1970 to 2009 of 13% (Baille et al. 2010) reflects a  
303 proportional increase in the probability of extinction of approximately 1% for values  
304 of  $c$  between 10,000 and 1,000,000 (Fig. 4). Smaller values of  $c$  imply larger changes

305 in the risk of extinction for a given change in LPI, although the results are relatively  
306 insensitive to the choice of  $c$  (Fig. 4).

### 307 **Discussion**

308 We derived indices that can be interpreted in terms of changes in extinction risk. By  
309 deriving the indices from theoretical population models, the merits of possible  
310 alternative indices can be assessed to determine which indices are best supported by  
311 data. Our analysis shows that the indices are positively correlated with the proportion  
312 of species going extinct in small patches, despite highly simplified assumptions used  
313 to build the indices.

314 In addition to the heuristic properties that Buckland et al. (2005) and van Strien et al.  
315 (2012) used to assess different indices of biodiversity, a good index should also be  
316 clearly related to particular management objectives. For example, we have shown that  
317 the geometric mean abundance of species, which has good heuristic properties  
318 (Buckland et al. 2005; van Strien et al. 2012), can be related to the proportion of  
319 species within an area that are likely to become extinct. This lends much greater  
320 support to this index as a biodiversity metric.

321 The geometric mean abundance of species is used increasingly, including in North  
322 American and European bird monitoring (Gregory and van Strien 2010; Butchart et  
323 al. 2010) and for planning fire management (Di Stefano et al. 2013). The LPI for  
324 reporting the state of species is the geometric mean abundance in each period, divided  
325 by the geometric mean abundance in the first time period (Loh et al. 2005; Collen et  
326 al. 2009). The LPI is based on the notion that changes in species abundance are  
327 important, but was not derived directly from ecological theory. We do not intend this  
328 as a particular criticism of the LPI, which has more support than some alternative

329 indices, but we argue that ecological indices should have sound theoretical  
330 foundations. A theoretical foundation helps make the meaning and scope of the index  
331 clearer and more easily justified. For example, the derivation of the index based on  
332 the geometric mean implies that reductions in the LPI can be interpreted in terms of  
333 an increased average probability of extinction of the species. We estimate that the  
334 reduction of the global avian LPI of approximately 13% between 1970 and 2009  
335 corresponds to approximately a 1% increase in the probability of extinction (Fig. 6).  
336 This is less than the increased risk of 7% implied by the Red List Index (RLI) of birds  
337 for the period 1988 to 2004 (Butchart et al. 2004), which is the only CBD index that is  
338 related directly to extinction. The larger increase in extinction risk implied by the RLI  
339 compared with  $I_g$  might be expected given the RLI's focus on threatened species.

340 Using a theoretical foundation to develop indices suggests ways in which the indices  
341 can be evaluated and improved, and assumptions underlying the indices are clear. The  
342 clear assumptions can be tested individually to determine whether they are violated in  
343 particular circumstances and the consequences of those errors. Further, the overall  
344 properties of an index can be assessed against data if it approximates an explicit  
345 quantity. In our case, we sought an index that would be linearly correlated with the  
346 proportion of species becoming extinct such that a change in the index would reflect a  
347 particular change in the proportion of species going extinct. The clear assumptions  
348 help highlight how the indices could be modified.

349 As an example of modification, trends in population size are likely to influence  
350 extinction risks. The index that incorporates trend ( $I_t$ ) shows how abundance and trend  
351 might be incorporated into a single index if the assumption of a consistent trend  
352 among communities is not supported. In the case of the experimental protozoan



353 community, an assumption of an equal trend is clearly not supported. Of the four  
354 protozoan species, one went extinct in all 40 experimental replicates, and one  
355 persisted in all replicates. Thus, the proportion of species in each community that  
356 went extinct was influenced substantially by the identity of the species, which had  
357 different trends not just different population sizes.

358 Biodiversity indices, such as those developed here, will be sensitive to the choice of  
359 species that are included. For example, species included in the LPI calculations are  
360 not a random sample of all possible species, with biases likely. Unless the scheme  
361 used to select the sample of species used in the index is considered carefully, it will be  
362 unclear how the selected species will represent the broader suite of biodiversity.

363 Factors other than those included in the indices are likely to influence extinction. The  
364 Lepidoptera species will be differentially susceptible to apparent local extinction  
365 because of different dispersal and abilities to persist outside the focal habitat patches.  
366 Other species will occur only ephemerally in the patches, reducing the influence of  
367 abundance on local extinction. However, the results were qualitatively identical when  
368 analysing only strict grassland specialists, so we reported only the results for the  
369 larger collection of species.

370 Our indices were based on models of exponential decline of single populations,  
371 thereby ignoring spatial aspects and density-dependence. Other indices based on  
372 metapopulation dynamics, for example, could be developed to account for spatial  
373 effects. Indeed, metapopulation capacity, which is a function of colonisation and extinction  
374 dynamics of habitat patches (Day and Possingham 1995; Hanski & Ovaskainen 2000),  
375 can be viewed as an index of metapopulation persistence (Moilanen and Nieminen  
376 2002). Density-dependence might be less important for populations that are declining

377 deterministically, although accounting for non-exponential decline might be important  
378 because temporal patterns of decline influence risk (Di Fonzo et al. 2013).

379 Imprecise estimation of abundance (particularly in the woodland case study), some  
380 residual uncertainty about the local extinction of species due to imperfect detection,  
381 and the false assumption of equivalent dynamics of all species would all weaken the  
382 correlation between the indices and the observed extinction rate. Despite this, the  
383 predicted and observed extinction risks were correlated (Figures 1-3). This implies  
384 that using the indices to aggregate data across species is reasonable. However, further  
385 tests of the indices to predict local extinction would be valuable, as would evaluating  
386 extinction risk over regions larger than just single patches (e.g., based on spatial  
387 population dynamics).

388 The index based on the power mean is sensitive to the choice of the parameter  $b$ , and  
389 estimating it via estimates the standard deviation of the population growth rate ( $\sigma$ )  
390 might be difficult. Thus, the indices based on the geometric mean ( $I_g$  and  $I_t$ ) might be  
391 more appealing because a freely-varying parameter does not require estimation.  
392 Further, extinctions might be dominated by deterministic declines rather than random  
393 fluctuation around a zero mean growth rate. If true, the indices based on the geometric  
394 mean might be preferred over that based on the power mean.

395 The SAFE index (Clement et al 2011; see also Akçakaya et al. 2011, Beissinger et al.  
396 2011 and McCarthy et al. 2011) is essentially equal to the logarithm of population  
397 size. Our analysis shows, therefore, that the SAFE index will be proportional to the  
398 expected time to quasi-extinction (time to reaching a given threshold). But it also  
399 shows that the SAFE index will be comparable among species as a measure of threat  
400 only if trends in population size of those species are similar. Where trends differ

401 among species, an index based on  $-\ln[x(0)]/\ln[\lambda]$  is likely to better reflect threat.  
402 Further, prioritization of management, which apparently motivated the SAFE index,  
403 should not be based on extinction risk, but on the ability to change risks (McCarthy et  
404 al. 2011). This might be assessed, for example, by the relative cost of changing  $x(0)$  or  
405  $\lambda$  and their influence on  $-\ln[\lambda]/\ln[x(0)]$  (Baxter et al. 2006).

406 An index developed without theory does not mean it will have poor properties. As we  
407 have seen, the geometric mean was developed without theory but appears to have  
408 useful properties (Buckland et al. 2005; van Strien et al. 2012). The demonstrated  
409 relationship to extinction risk lends further support to the geometric mean. Our  
410 analysis also indicates how the geometric mean might incorporate population trends.  
411 We suggest that biodiversity indices should be developed more frequently from  
412 theoretical foundations to provide more explicit links between the index, the data  
413 underlying the index, and the meaning of changes in the index. Such indices will  
414 inevitably exclude factors that might be important; this is a feature of any model.  
415 However, stronger theoretical foundations for biodiversity indices would clarify the  
416 features that are considered and those that are ignored, and would allow the indices to  
417 be more easily evaluated and improved.

## 418 **Acknowledgments**

419 This research was supported by an Australian Research Council (ARC) Future  
420 Fellowship (FT100100923), and the ARC Centre of Excellence for Environmental  
421 Decisions. We thank John Baumgartner for help with collating the data on bird  
422 abundances, Ben Collen for providing values for the Living Planet Index of birds, and  
423 Joslin Moore, Richard Gregory and an anonymous reviewer for comments on a draft  
424 manuscript.

425 **Literature Cited**

- 426 Akçakaya, H.R., G. M. Mace, K. J. Gaston, H. Regan, A. Punt, S. H. M. Butchart, D.  
427 A. Keith, and U. Gärdenfors. 2011. The SAFE index is not safe. *Frontiers in*  
428 *Ecology and Environment* **9**:485-486.
- 429 Baillie, J. E. M., J. Griffiths, S. T. Turvey, J. Loh, and B. Collen. 2010. *Evolution*  
430 *Lost: Status and Trends of the World's Vertebrates*. Zoological Society of  
431 London, UK.
- 432 Baxter, P. W. J., M.A. McCarthy, H. P. Possingham, P. W. Menkhorst, and N.  
433 McLean. 2006. Accounting for management costs in sensitivity analyses of matrix  
434 population models. *Conservation Biology* **20**:893-905.
- 435 Beissinger, S. R., C. H. Flather, G. D. Hayward, and P. A. Stephens. 2011. No safety  
436 in numbers. *Frontiers in Ecology and Environment* **9**:486.
- 437 Buckland, S. T., A. E. Magurran, R. E. Green, & R. M. Fewster. 2005. Monitoring  
438 change in biodiversity through composite indices. *Philosophical Transactions of*  
439 *the Royal Society B-Biological Sciences* **360**:243-254.
- 440 Butchart, S. H., H. R. Akçakaya, J. Chanson, J. E. Baillie, B. Collen, S. Quader, W. R.  
441 Turner, R. Amin, S. N. Stuart, C. Hilton-Taylor. 2007. Improvements to the Red  
442 List Index. *PLoS ONE* **2**(1): e140. doi:10.1371/journal.pone.0000140.
- 443 Butchart, S.H.M., Walpole, M., Collen, B., van Strien, A., Scharlemann, J.P.W.,  
444 Almond, R.E.A., Baillie, J.E.M., Bomhard, B., Brown, C., Bruno, J., Carpenter,  
445 K.E., Carr, G.M., Chanson, J., Chenery, A.M., Csirke, J., Davidson, N.C.,  
446 Dentener, F., Foster, M., Galli, A., Galloway, J.N., Genovesi, P., Gregory, R.D.,  
447 Hockings, M., Kapos, V., Lamarque, J-F., Leverington, F., Loh J., McGeoch,

- 448 M.A., McRae, L., Minasyan A., Hernández Morcillo, M., Oldfield, T.E.E., Pauly,  
449 D., Quader, S., Revenga, C., Sauer, J.R., Skolnik, B., Spear, D., Stanwell-Smith,  
450 D., Stuart, S.N., Symes, A., Tierney, M., Tyrrell, T.D., Vié, J-C & Watson, R.  
451 2010. Global biodiversity: indicators of recent declines. *Science* **328**:1164-1168.
- 452 Clements, G. R., C.J.A. Bradshaw, B.W. Brook, and W. F. Laurance. 2011. The  
453 SAFE index: using a threshold population target to measure relative species threat  
454 *Frontiers in Ecology and Environment* **9**:521-525.
- 455 Clements, C. F., N. Worsfold, P. Warren, B. Collen, T. Blackburn, N. Clark, and O.  
456 L. Petchey. 2013. Experimentally testing an extinction estimator: Solow's Optimal  
457 Linear Estimation model. *Journal of Animal Ecology* **82**:345-354.
- 458 Collar, N. J. 1998. Extinction by assumption; or, the Romeo Error on Cebu. *Oryx*  
459 **32**:239-244.
- 460 Collen, B., J. Loh, S. Whitmee, L. McRae, R. Amin, and J. E. M. Baillie. 2009.  
461 Monitoring change in vertebrate abundance: the Living Planet Index.  
462 *Conservation Biology* **23**:317-327.
- 463 Day, J.R., and Possingham, H.P. 1995. A stochastic metapopulation model with  
464 variability in patch size and position. *Theoretical Population Biology* **48**: 333-360.
- 465 Dennis, B., P. L. Munholland, and J. M. Scott. 1991. Estimation of growth and  
466 extinction parameters for endangered species. *Ecological Monographs* **61**:115-  
467 143.

- 468 Di Fonzo, M., Collen, B., and Mace, G. M. 2013. A new method for identifying rapid  
469 decline dynamics in wild vertebrate populations. *Ecology and Evolution* **3**:2378-  
470 2391.
- 471 Di Stefano, J., McCarthy, M.A., York, A., Duff, T.J., Slingo, J., and Christie, F. 2013.  
472 Defining vegetation age class distributions for multispecies conservation in fire-  
473 prone landscapes. *Biological Conservation* **166**:111-117.
- 474 Gaston, K. J., and T. M. Blackburn. 2003. Macroecology and conservation biology.  
475 Pages 345-367 in T.M. Blackburn, and K. J. Gaston, editors. *Macroecology:*  
476 *concepts and consequences*. Blackwell Science, Oxford.
- 477 Ginzburg, L. R., L. B. Slobodkin, K. Johnson, and A. G. Bindman. 1982.  
478 Quasiextinction probabilities as a measure of impact on population growth. *Risk*  
479 *Analysis* **2**:171-181.
- 480 Gregory R.D., and van Strien, A. 2010. Wild bird indicators: using composite  
481 population trends of birds as measures of environmental health. *Ornithological*  
482 *Science* **9**:3-22.
- 483 Hanski, I. and Ovaskainen, O. 2000. The metapopulation capacity of a fragmented  
484 landscape. *Nature* **404**: 755-758.
- 485 IUCN. 2001. *IUCN Red List Categories and Criteria: Version 3.1*. IUCN Species  
486 Survival Commission, Gland, Switzerland and Cambridge, UK,
- 487 Jones, J. P. G., B. Collen, G. Atkinson, P. W. J. Baxter, P. Bubb, J. B. Illian, T. E.  
488 Katzner, A. Keane, J. Loh, E. McDonald-Madden, et al. 2011. The why, what, and

- 489        how of global biodiversity indicators beyond the 2010 target. *Conservation*  
490        *Biology* **25**:450-457.
- 491    Jost, L. 2006. Entropy and diversity. *Oikos* **113**:363-375.
- 492    Keith, D. A., and M. A. Burgman. 2004. The Lazarus effect: can the dynamics of  
493        extinct species lists tell us anything about the status of biodiversity? *Biological*  
494        *Conservation* **117**:41-48.
- 495    Krauss, J., I. Steffan-Dewenter, & T. Tschardt. 2003. Local species immigration,  
496        extinction, and turnover of butterflies in relation to habitat area and habitat  
497        isolation. *Oecologia* **137**:591-602.
- 498    Krishnamoorthy, K. 2006. *Handbook of statistical distributions with applications*.  
499        Boca Raton, Chapman & Hall/CRC.
- 500    Lande, R. 1993. Risks of population extinction from demographic and environmental  
501        stochasticity and random catastrophes. *American Naturalist* **142**:911-927.
- 502    Loh, J., R. E. Green, T. Ricketts, J. Lamoreux, M. Jenkins, V. Kapos, and J. Randers.  
503        2005. The Living Planet Index: using species population time series to track  
504        trends in biodiversity. *Philosophical Transactions of the Royal Society B-*  
505        *Biological Sciences* **360**:289-295.
- 506    Magurran, A. E. 2004. *Measuring biological diversity*. Oxford, Blackwell Science.
- 507    McCarthy, M. A., and C. Thompson. 2001. Expected minimum population size as a  
508        measure of threat. *Animal Conservation* **4**:351-355.

- 509 McCarthy, M.A., G. E. Garrard, A. L. Moore, K. M. Parris, T. J. Regan, and G. E.  
510 Ryan. 2011. The SAFE index should not be used for prioritization. *Frontiers in*  
511 *Ecology and the Environment* **9**:486-487.
- 512 Moilanen, A., and Nieminen, M. 2002. Simple connectivity measures in spatial  
513 ecology. *Ecology* **83**:1131-1145.
- 514 Rout, T. M., D. Heinze, and M. A. McCarthy. 2010. Optimal allocation of  
515 conservation resources to species that may be extinct. *Conservation Biology*  
516 **24**:1111-1118.
- 517 Secretariat of the Convention on Biological Diversity. 2010. *Global Biodiversity*  
518 *Outlook 3*. Secretariat of the Convention on Biological Diversity, Montreal,  
519 Canada.
- 520 Stauffer, H. B., C. J. Ralph, S. L. Miller. 2002. Incorporating detection uncertainty  
521 into presence-absence surveys for marbled murrelet. Pages 357-365 J. M. Scott, P.  
522 J. Heglund, M. L. Morrison, J. B. Haufler, M. G. Martin, W. A. Wall and F. B.  
523 Samson, editors. *Predicting species occurrences: issues of accuracy and scale*. :  
524 Island Press, Washington, D.C.
- 525 Sutton, F. M., and J. W. Morgan. 2009. Functional traits and prior abundance explain  
526 native plant extirpation in a fragmented woodland landscape. *Journal of Ecology*  
527 **97**:718-727.
- 528 van Strien, A. J., Soldaat, L., and Gregory, R.D. 2012. Desirable mathematical  
529 properties of indicators for biodiversity change. *Ecological Indicators* **14**:202-208.
- 530



531 Figure 1. Relationship between the index based the geometric mean,  $I_g$ , and the  
532 proportion of species going locally extinct for the three case studies: a, Lepidoptera  
533 ( $r = 0.67$ ); b, woodland plants ( $r = 0.66$ ); and c, protozoan communities ( $r = -0.32$ ).  
534 Each point represents a patch for the field studies (a, b) or the average of each type of  
535 community for the protozoans (c). The lines are linear regressions.

536

537 Figure 2. Relationship between the index based the population trend,  $I_t$ , and the  
538 proportion of species in protozoan communities going locally extinct ( $r = 0.43$ ). Each  
539 point represents the average of each type of community for the protozoans. The line is  
540 a linear regression.

541 Figure 3. Relationship between the index based the power mean,  $I_b$ , and the  
542 proportion of species going locally extinct for the three case studies: a, Lepidoptera  
543 ( $r = 0.40$ ); b, woodland plants ( $r = 0.66$ ); and c, protozoan communities ( $r = -0.20$ ).  
544 Each point represents a patch for the field studies (a, b) or the average of each type of  
545 community for the protozoans (c). In (a) there are multiple data points near the origin,  
546 and in (c) there are three data points at the coordinate (0.33, 0.67). The lines are linear  
547 regressions.

548 Figure 4. Proportional changes in the probability of extinction from levels in 1970  
549 based on changes in the Living Planet Index for birds (Baille et al. 2010) assuming  
550 values for the geometric mean abundance in 1970 of 10,000, 100,000 or 1,000,000  
551 individuals.

552

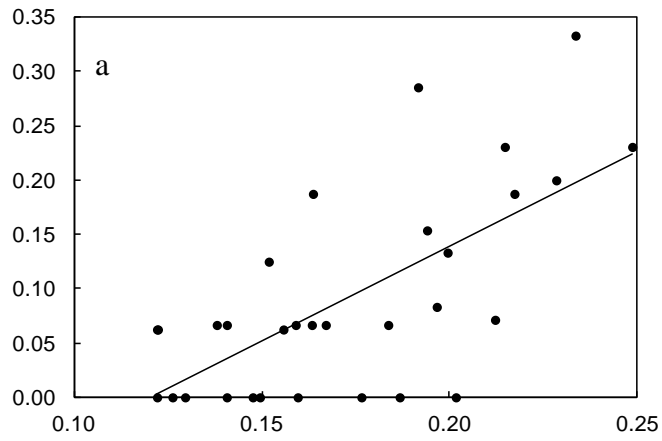

553

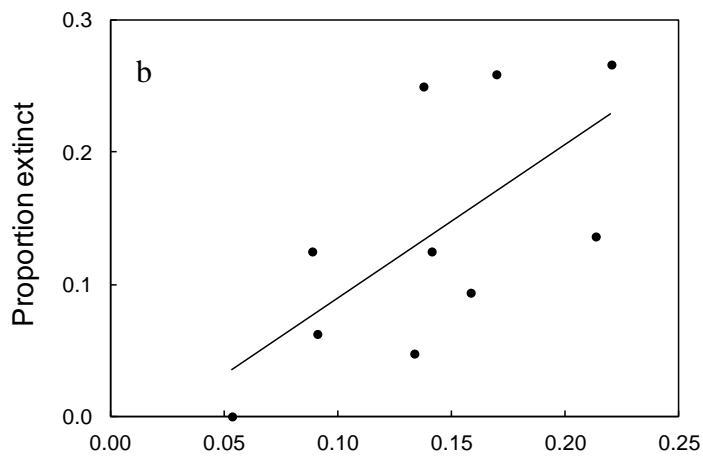

554

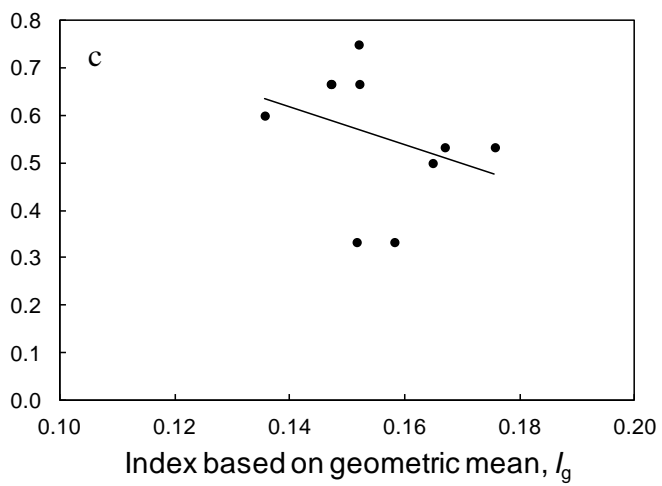

555

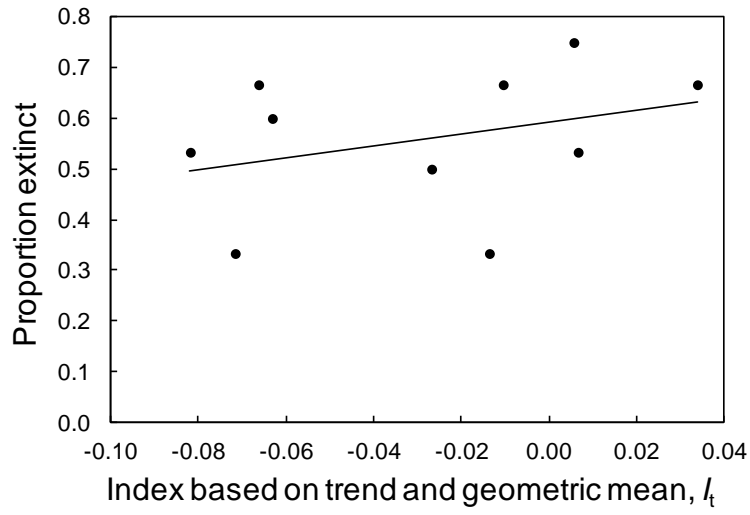

556  
557

558

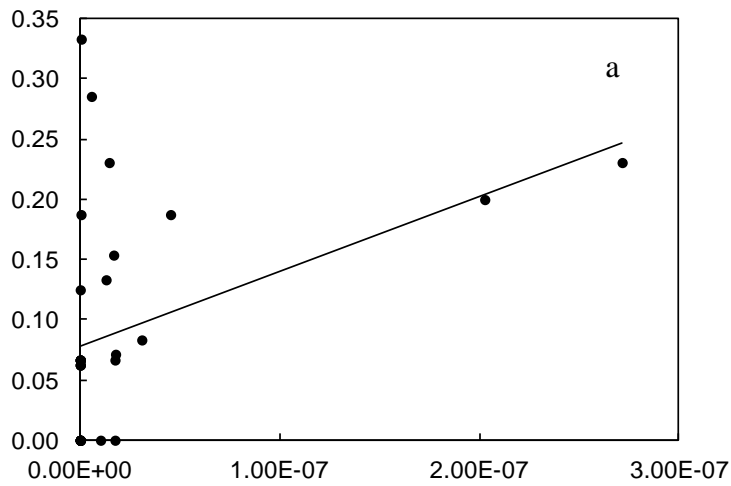

559  
560

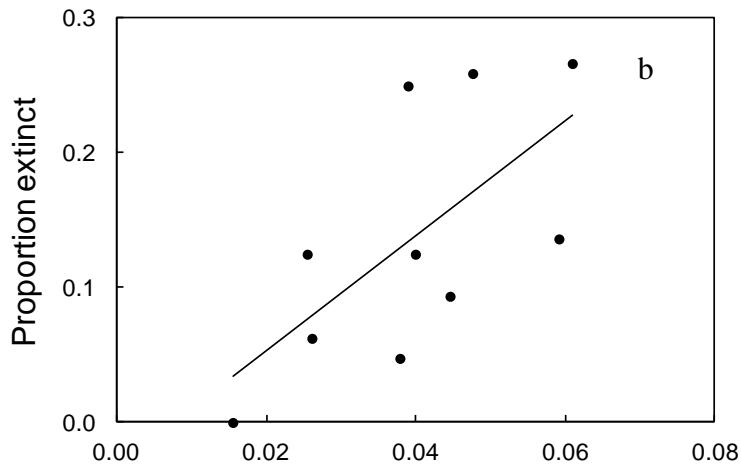

561

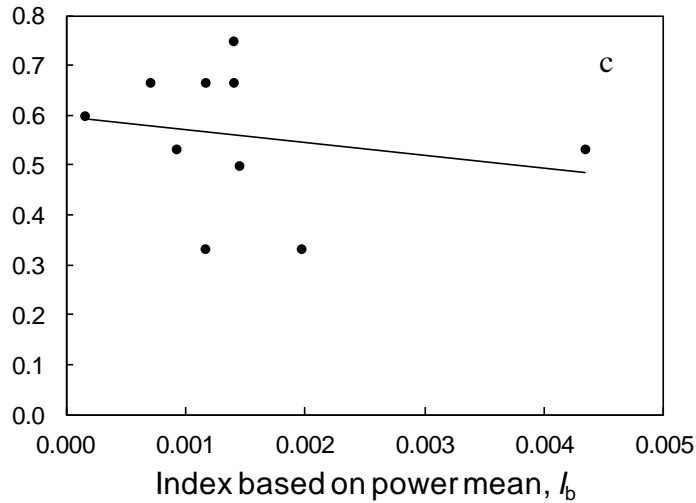

562  
563  
564  
565  
566  
567  
568  
569

570

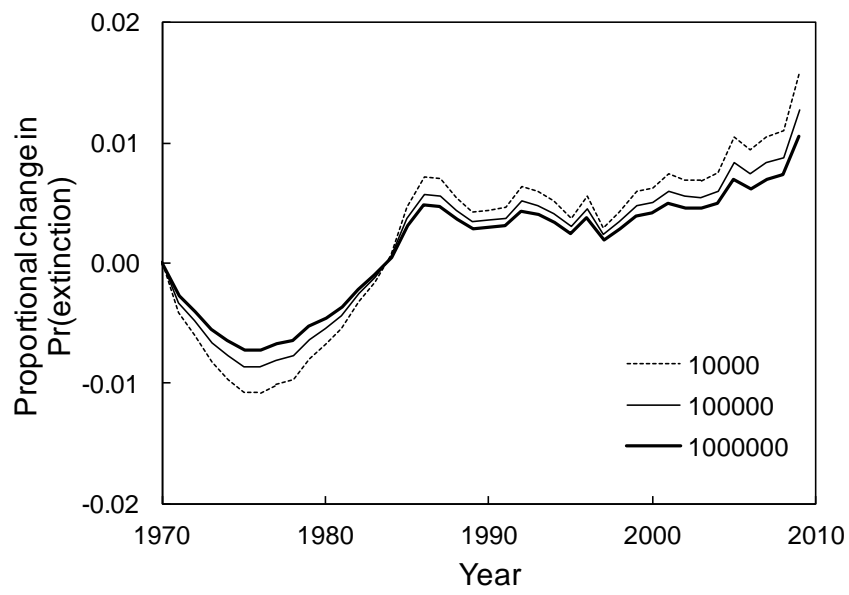

571  
572
